# Supplementary material for: Development of Hairy Root Cultures for Biomass and Triterpenoid Production in Centella asiatica
Source: MDPI journal article supplement (doi:10.3390/plants11020148), 2022-01-06
Supplement: s1 [file s1]

Supplementary Material

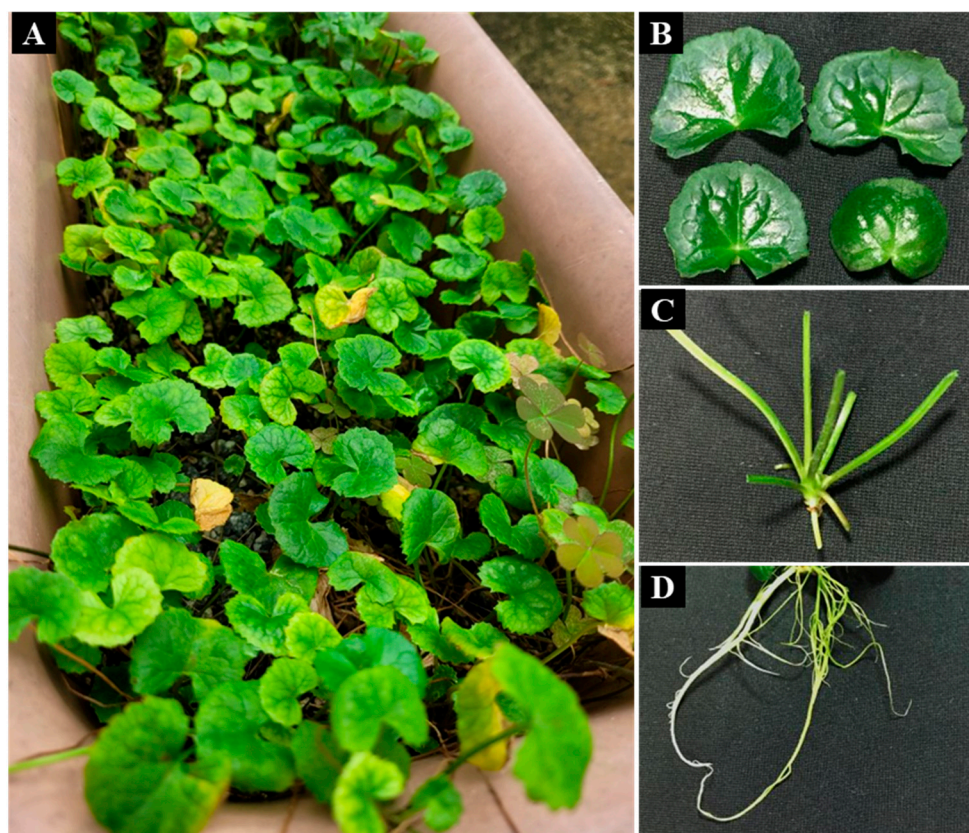

**Figure S1.** *Centella asiatica* characteristic. (A) field-grown plant; (B) leaf; (C) petiole; (D) root.

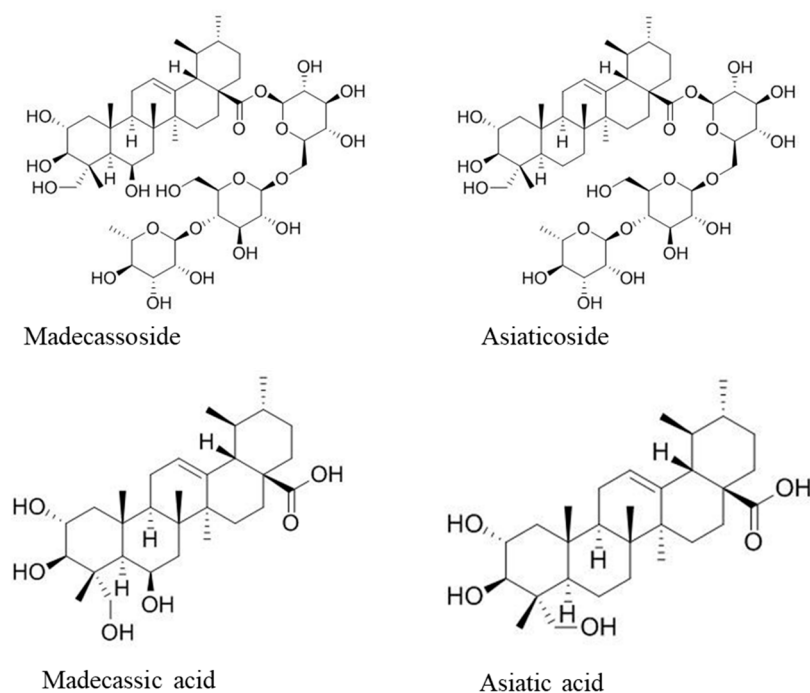

**Figure S2.** Chemical structure of triterpenoids in *Centella asiatica*.
